# Supplementary material
Source: PubMed Central journal article supplement (PMC4989306)
Supplement: ismej201614x1.pdf [file ismej201614x1.pdf]

## **Supplementary information:**

# **Genomic and *in situ* investigations of the novel uncultured Chloroflexi associated with 0092 morphotype filamentous bulking in activated sludge**

Simon Jon McIlroy, Søren Michael Karst, Marta Nierychlo, Morten Simonsen Dueholm, Mads Albertsen, Rasmus Hansen Kirkegaard, Robert James Seviour and Per Halkjær Nielsen

## **Contents**

**Figure S1.** Metabolic summary for Cfx-K in activated sludge

**Figure S2.** Phylogenetic tree for the available Chloroflexi genomes

**Figure S3.** Annotated cell envelope components of the Cfx-K genome

**Figure S4.** FISH and corresponding bright-field MAR micrographs for B45 taxon members in full-scale sludge

**Figure S5.** Phylogenetic tree of [NiFe]-hydrogenases

**Table S1.** Summary of activated sludge biomass samples

**Table S2.** Genome assembly statistics

**Table S3.** COG classification summary table for the Cfx-K genome

**Table S4.** Summary of phenotypic characteristics of members of the classes Ardentcatenia, Anaerolineae and Caldilineae

**Table S5.** List of curated annotations for the Cfx-K genome

## **References**

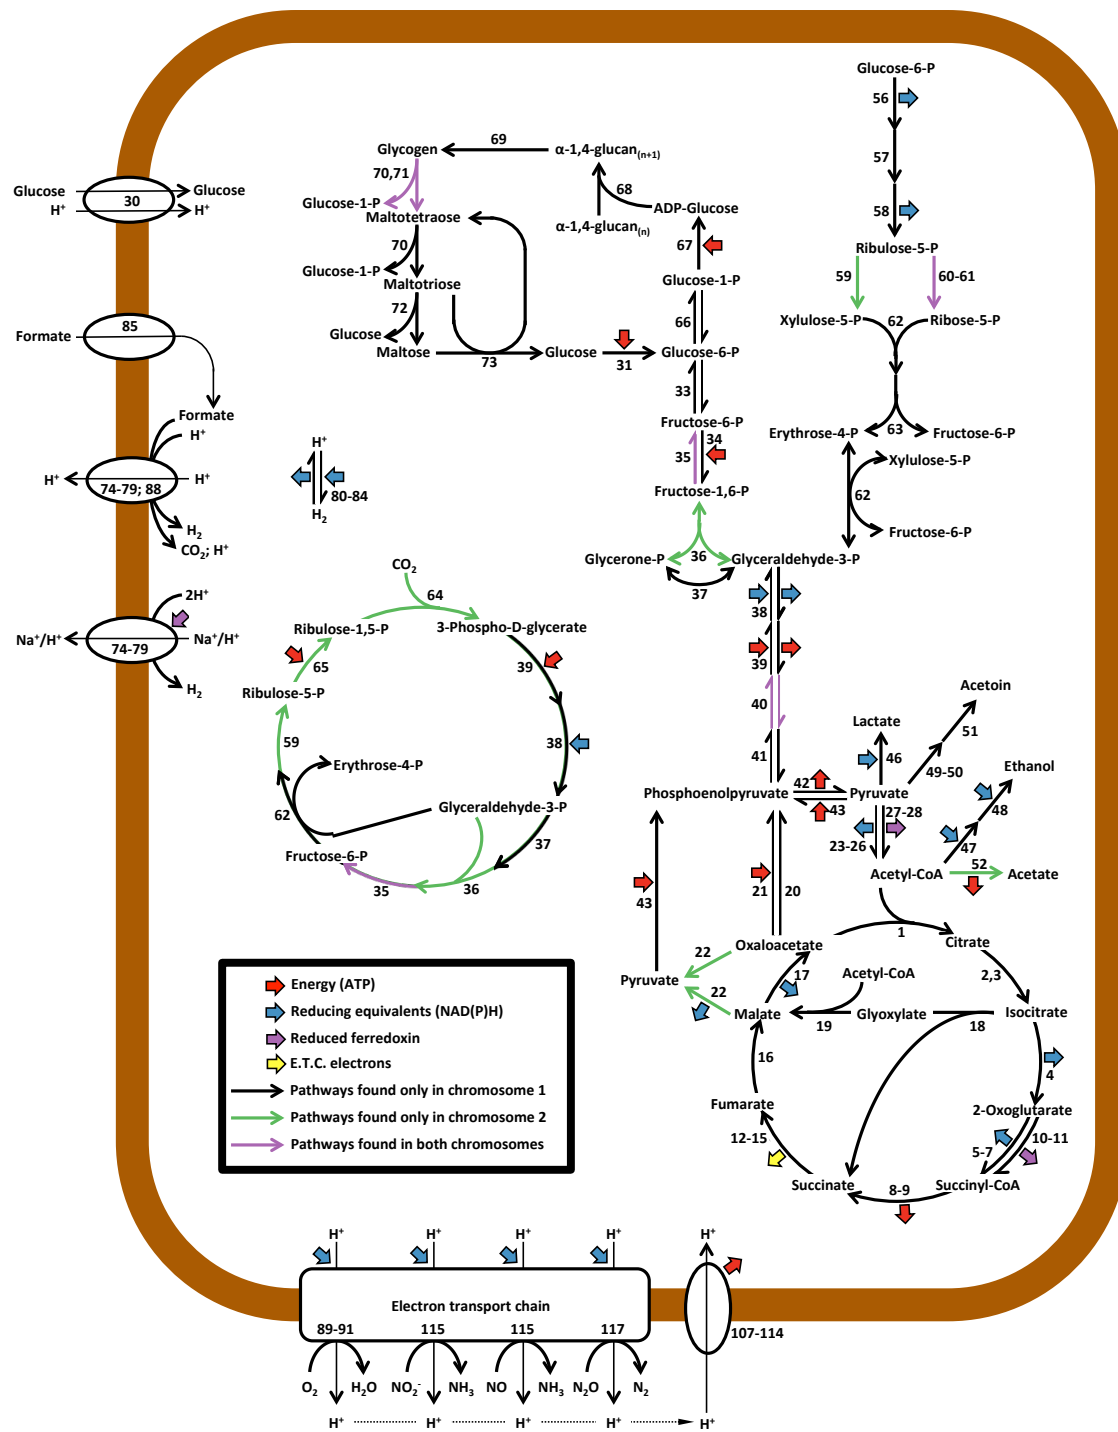

**Figure S1.** Metabolic summary for Cfx-K in activated sludge. Reference numbers for each reaction relate to the details in **Table S2**.

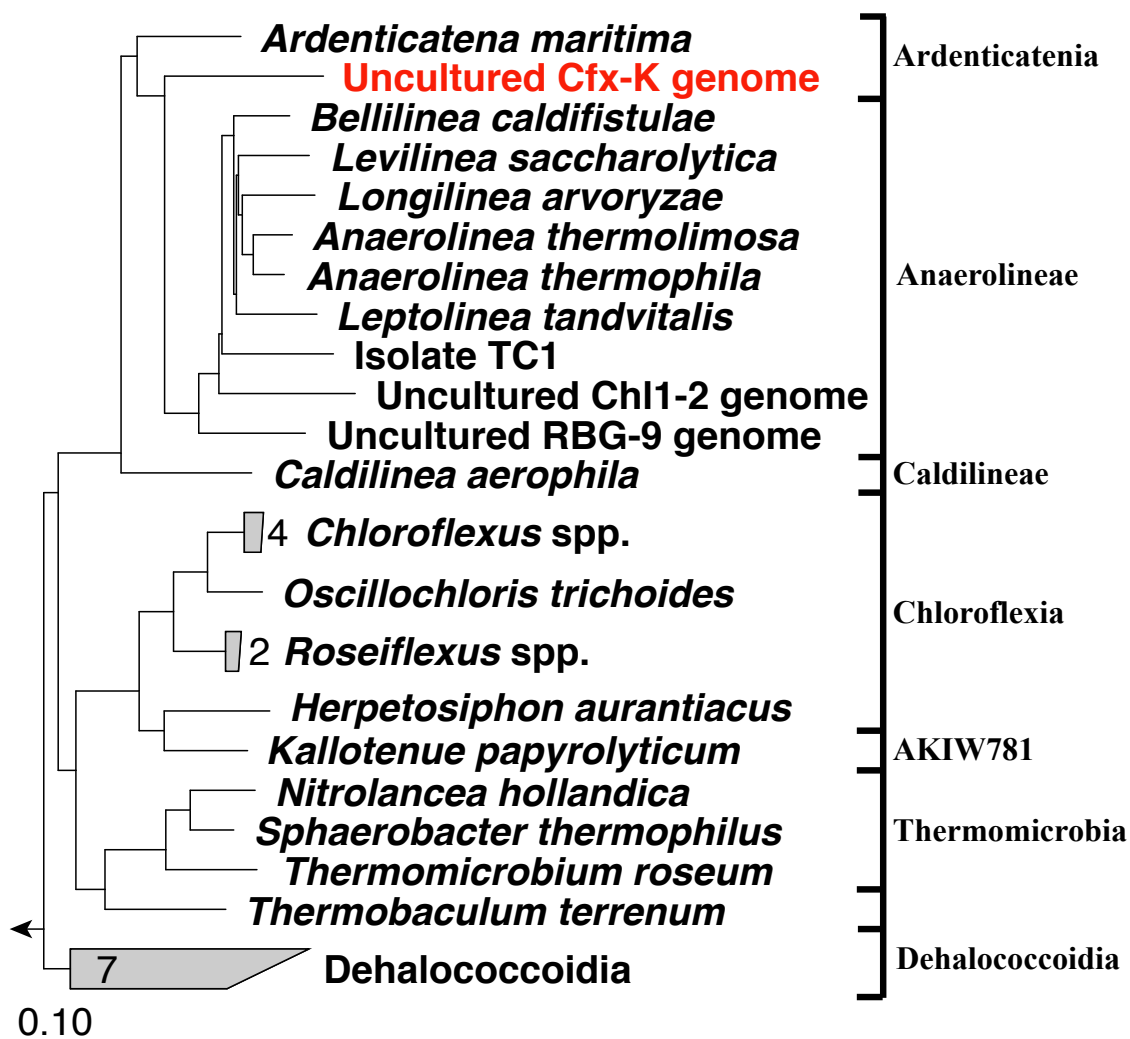

**Figure S2.** Phylogenetic tree for the available Chloroflexi genomes. The CheckM software (Parks *et al.*, 2015) was used to generate the tree using default settings, which is inferred from the concatenation of 43 conserved marker genes and incorporates 2052 finished and 3604 draft genomes from the IMG database (Markowitz *et al.*, 2012). Generated trees were imported into ARB for visualization and phylogenetic grouping of sequences into clades. Additional genomes include: *Leptolinea tandvitalis* (BBYA00000000), *Longilinea arvoryzae* (BBXY00000000), *Anaerolineaceae* bacterium TC1 (BBYH00000000), *Ardentecatenia maritima* (BBZA00000000), *Anaerolinea thermolimos* (BBXW00000000), *Bellilinea caldifistulae* (BBXX00000000), *Levilinea saccharolytica* (BBXZ00000000), *Nitrolancea hollandica* (CAGS00000000), RBG-9 (PRJNA167727) and Ch11-2 (APVK00000000). The genome obtained in this study is shown in red. Class level classification (right) is based on the MiDAS database (Release 1.20).

|             |          |         | Cell envelope characteristics                                           |                |             |            |             |                     |             |               |               |              |               |          |            |                 |                |              | M              |               |           |                  |                              |   |
|-------------|----------|---------|-------------------------------------------------------------------------|----------------|-------------|------------|-------------|---------------------|-------------|---------------|---------------|--------------|---------------|----------|------------|-----------------|----------------|--------------|----------------|---------------|-----------|------------------|------------------------------|---|
| Enriched in | Category | PFAM    | PFAM description                                                        | M              | M           | M          | M           | D                   | DA          | DA            | DA            | DA           | DL            | DL       | DL         | DL              | DL             | DL           | DL             | DL            | DL        | DL               | DL                           | M |
|             |          |         |                                                                         | Actinobacteria | Chloroflexi | Firmicutes | Tenericutes | Deinococcus-Thermus | Thermotogae | Synechistales | Cyanobacteria | Fusobacteria | Bacteroidetes | Chlorobi | Chlamydiae | Verrucomicrobia | Planctomycetes | Spirochaetes | Proteobacteria | Acidobacteria | Aquificae |                  | Chloroflexi 0092 k2          |   |
| P           | LPS      | PF04413 | Glycos_transf_N - (kdottransferase)                                     | 0              | 0           | 0.01       | 0           | 0                   | 0.67        | 0.02          | 1             | 0.92         | 1             | 0.97     | 0.88       | 1               | 0.22           | 0.93         | 1              | 1             |           |                  |                              |   |
| P           | LPS      | PF02614 | LpxK - Tetraacyl-disaccharide-1-P 4'-kinase                             | 0              | 0           | 0.01       | 0           | 0                   | 0.67        | 0.05          | 1             | 0.98         | 1             | 1        | 1          | 1               | 0.16           | 0.94         | 1              | 1             |           |                  |                              |   |
| P           | LPS      | PF02684 | LpxB - Lipid-A-disaccharide synthetase                                  | 0              | 0           | 0.02       | 0           | 0.17                | 0           | 0.67          | 1             | 0.96         | 0.98          | 1        | 1          | 1               | 1              | 0.22         | 0.93           | 1             | 1         |                  |                              |   |
| P           | LPS      | PF03331 | LpxC - UDP-3-O-acyl N-acetylglucosamine deacetylase                     | 0              | 0           | 0.02       | 0           | 0.25                | 0           | 0.67          | 0.98          | 1            | 0.98          | 1        | 1          | 1               | 1              | 0.22         | 0.93           | 1             | 0.92      |                  |                              |   |
| P           | LPS      | PF04613 | LpxD - UDP-3-O-[3-hydroxymyristoyl] glucosamine N-acyltransferase, LpxD | 0              | 0           | 0.02       | 0           | 0                   | 0.33        | 1             | 1             | 0.98         | 1             | 1        | 1          | 1               | 1              | 0.22         | 0.91           | 1             | 0.5       |                  |                              |   |
| P           | CE       | PF02472 | ExbD - Biopolymer transport protein ExbD/TolR                           | 0              | 0           | 0.02       | 0           | 0.75                | 0           | 1             | 0.59          | 1            | 0.99          | 1        | 1          | 1               | 1              | 0.33         | 0.96           | 1             | 1         |                  |                              |   |
| P           | CE       | PF07244 | Surf_Ag_VNR - Surface antigen variable number repeat                    | 0              | 0           | 0.02       | 0           | 1                   | 1           | 0.67          | 1             | 1            | 1             | 1        | 1          | 1               | 1              | 1            | 1              | 1             | 1         |                  |                              |   |
| P           | CE       | PF03739 | YjgP_YjgQ - Predicted permease YjgP/YjgQ family                         | 0              | 0           | 0.02       | 0           | 1                   | 1           | 0.67          | 1             | 1            | 0.99          | 1        | 1          | 1               | 1              | 1            | 1              | 0.95          | 1         | 1                |                              |   |
| P           | CE       | PF01103 | Bac_surface_Ag - Surface antigen                                        | 0              | 0           | 0.02       | 0           | 1                   | 0.77        | 0.67          | 1             | 1            | 0.99          | 1        | 1          | 1               | 1              | 1            | 1              | 1             | 1         |                  |                              |   |
| P           | CE       | PF00263 | Secretin - Bacterial type II and III secretion system protein           | 0              | 0           | 0.01       | 0           | 1                   | 1           | 1             | 0.8           | 1            | 0.08          | 0.42     | 1          | 0.88            | 1              | 0.18         | 0.85           | 1             | 1         |                  |                              |   |
| P           | CE       | PF02321 | OEP - Outer membrane efflux protein                                     | 0              | 0           | 0.13       | 0           | 0.83                | 0.62        | 0.67          | 1             | 1            | 0.98          | 1        | 0          | 1               | 1              | 0.87         | 0.98           | 1             | 1         |                  |                              |   |
| P           | CE       | PF03968 | OstA - OstA-like protein                                                | 0              | 0           | 0.02       | 0           | 0.92                | 0.62        | 1             | 0.8           | 0.88         | 0.23          | 0.25     | 0          | 0.75            | 0.11           | 0.91         | 0.95           | 0.6           | 1         |                  |                              |   |
| P           | CE       | PF00593 | TonB_dep_Rec - TonB dependent receptor                                  | 0.01           | 0           | 0.01       | 0           | 0                   | 0.67        | 0.34          | 0.96          | 0.98         | 1             | 0        | 1          | 0.33            | 0.29           | 0.87         | 1              | 1             |           |                  |                              |   |
| P           | CE       | PF03544 | TonB - Gram-negative bacterial tonB protein                             | 0              | 0           | 0.02       | 0           | 0                   | 0.67        | 0.46          | 0.83          | 0.98         | 1             | 0        | 0.88       | 0.33            | 0.24           | 0.89         | 1              | 1             |           |                  |                              |   |
| P           | CE       | PF07715 | Plug - TonB-dependent Receptor Plug Domain                              | 0              | 0           | 0.01       | 0           | 0                   | 0.67        | 0.36          | 0.96          | 0.98         | 1             | 0        | 1          | 0.33            | 0.31           | 0.88         | 1              | 1             |           |                  |                              |   |
| P           | CE       | PF04166 | PdxA - Pyridoxal phosphate biosynthetic protein PdxA                    | 0.14           | 0           | 0.16       | 0           | 0                   | 0.08        | 0.33          | 0.98          | 0.5          | 0.97          | 1        | 0          | 1               | 1              | 0.18         | 0.88           | 0.4           | 1         |                  |                              |   |
| P           | CE       | PF06835 | Lipopolysaccharide-assembly, LptC-related                               | 0              | 0           | 0.01       | 0           | 0                   | 0.23        | 0.33          | 0.97          | 0.75         | 0.95          | 1        | 0          | 0.38            | 0.11           | 0.38         | 0.81           | 0.4           | 0.75      |                  |                              |   |
| P           | CE       | PF03740 | PdxJ - Pyridoxal phosphate biosynthesis protein PdxJ                    | 0              | 0           | 0          | 0           | 0                   | 0           | 0.98          | 0             | 0.8          | 1             | 0        | 1          | 1               | 0.13           | 0.9          | 0              | 1             |           |                  |                              |   |
| P           | CE       | PF03548 | LolA - Outer membrane lipoprotein carrier protein LolA                  | 0              | 0           | 0          | 0           | 0.08                | 0           | 0             | 0             | 0            | 0.72          | 0        | 0          | 0.25            | 0.22           | 0.47         | 0.97           | 1             | 1         |                  |                              |   |
| P           | CE       | PF04052 | TolB_N - TolB amino-terminal domain                                     | 0              | 0           | 0          | 0           | 0                   | 0           | 0             | 0             | 0            | 0             | 0.83     | 0          | 0.13            | 0              | 0            | 0.92           | 1             | 0         |                  |                              |   |
| P           | CE       | PF04453 | OstA_C - Organic solvent tolerance protein                              | 0              | 0           | 0          | 0           | 0                   | 0           | 0             | 0             | 0            | 0             | 0        | 0.5        | 0.33            | 0.09           | 0.93         | 1              | 0.5           |           |                  |                              |   |
| A+F         | CE       | PF02645 | DegV - Uncharacterised protein, DegV family COG1307                     | 0.65           | 1           | 0.96       | 1           | 1                   | 1           | 0             | 0             | 0.96         | 0.01          | 0.08     | 0          | 0               | 0              | 0            | 0.06           | 0             | 0         |                  | CFX0092_v1_a2545             |   |
| A+F         | CE       | PF05103 | DivIVA - DivIVA protein                                                 | 0.98           | 0.33        | 0.91       | 0.71        | 0.92                | 0.38        | 1             | 0             | 0            | 0.07          | 0.08     | 0          | 0               | 0              | 0.02         | 0.05           | 0             | 0.17      |                  |                              |   |
| A+F         | CE       | PF02650 | HTH_WhiA - Sporulation Regulator WhiA C terminal domain                 | 0.98           | 0           | 0.98       | 1           | 0                   | 1           | 0.67          | 0             | 1            | 0             | 0        | 0          | 0               | 0              | 0            | 0              | 0             | 0         |                  |                              |   |
| A+F         | CE       | PF10298 | WhiA_N - Sporulation Regulator WhiA N terminal                          | 0.94           | 0           | 0.94       | 0.57        | 0                   | 0.69        | 0             | 0             | 0.92         | 0             | 0        | 0          | 0               | 0              | 0            | 0              | 0             | 0         |                  |                              |   |
| A+F         | CE       | PF04472 | DUF552 - Protein of unknown function (DUF552)                           | 0.99           | 0           | 0.97       | 0.57        | 0                   | 0           | 0.33          | 0.98          | 1            | 0             | 0        | 0          | 0               | 0              | 0            | 0              | 0             | 0         |                  |                              |   |
| A+F         | CE       | PF04203 | Sortase - Sortase family                                                | 0.78           | 0.6         | 0.84       | 0           | 0                   | 0           | 0             | 0             | 0            | 0             | 0        | 0          | 0               | 0              | 0.07         | 0.4            |               |           | CFX0092_v1_a1813 |                              |   |
| A+F         | CE       | PF03816 | LytR_cpsA_psr - Cell envelope-related transcriptional attenuator domain | 0.99           | 0.6         | 0.98       | 0           | 1                   | 1           | 0.67          | 0.82          | 0.17         | 0.02          | 0        | 0          | 0               | 0              | 0.91         | 0              | 0             |           |                  | CFX0092_v1_a0162_a1038_a2212 |   |
| A+F         | Other    | PF09269 | DUF1967 - Domain of unknown function (DUF1967)                          | 0.98           | 1           | 0.98       | 1           | 1                   | 1           | 1             | 0             | 1            | 0             | 0        | 0          | 0               | 0              | 0            | 0              | 0             | 0         |                  | CFX0092_v1_a3578             |   |
| A+F         | Other    | PF01424 | R3H - R3H domain                                                        | 0.9            | 1           | 0.81       | 0.07        | 1                   | 1           | 1             | 0.61          | 0.96         | 0             | 0        | 0          | 0.38            | 0              | 1            | 0.05           | 0.8           | 0         |                  | CFX0092_v1_a0550_a3587       |   |

**Figure S3.** Annotated cell envelope components of the Cfx-K genome. The genome encodes protein families consistent with an archetypical monoderm cell envelope. Protein families substantially enriched or depleted in archetypal monoderm lineages (Actinobacteria and Firmicutes, A+F) relative to an archetypal diderm lineage (Proteobacteria, P), most of which have known roles in cell envelope biosynthesis. Cell envelope classification: Monoderm (M), Diderm (D), Diderm-LPS (DL), Diderm-Atypical (DA). Category: Lipopolysaccharide related (LPS), Cell envelope related (CE).

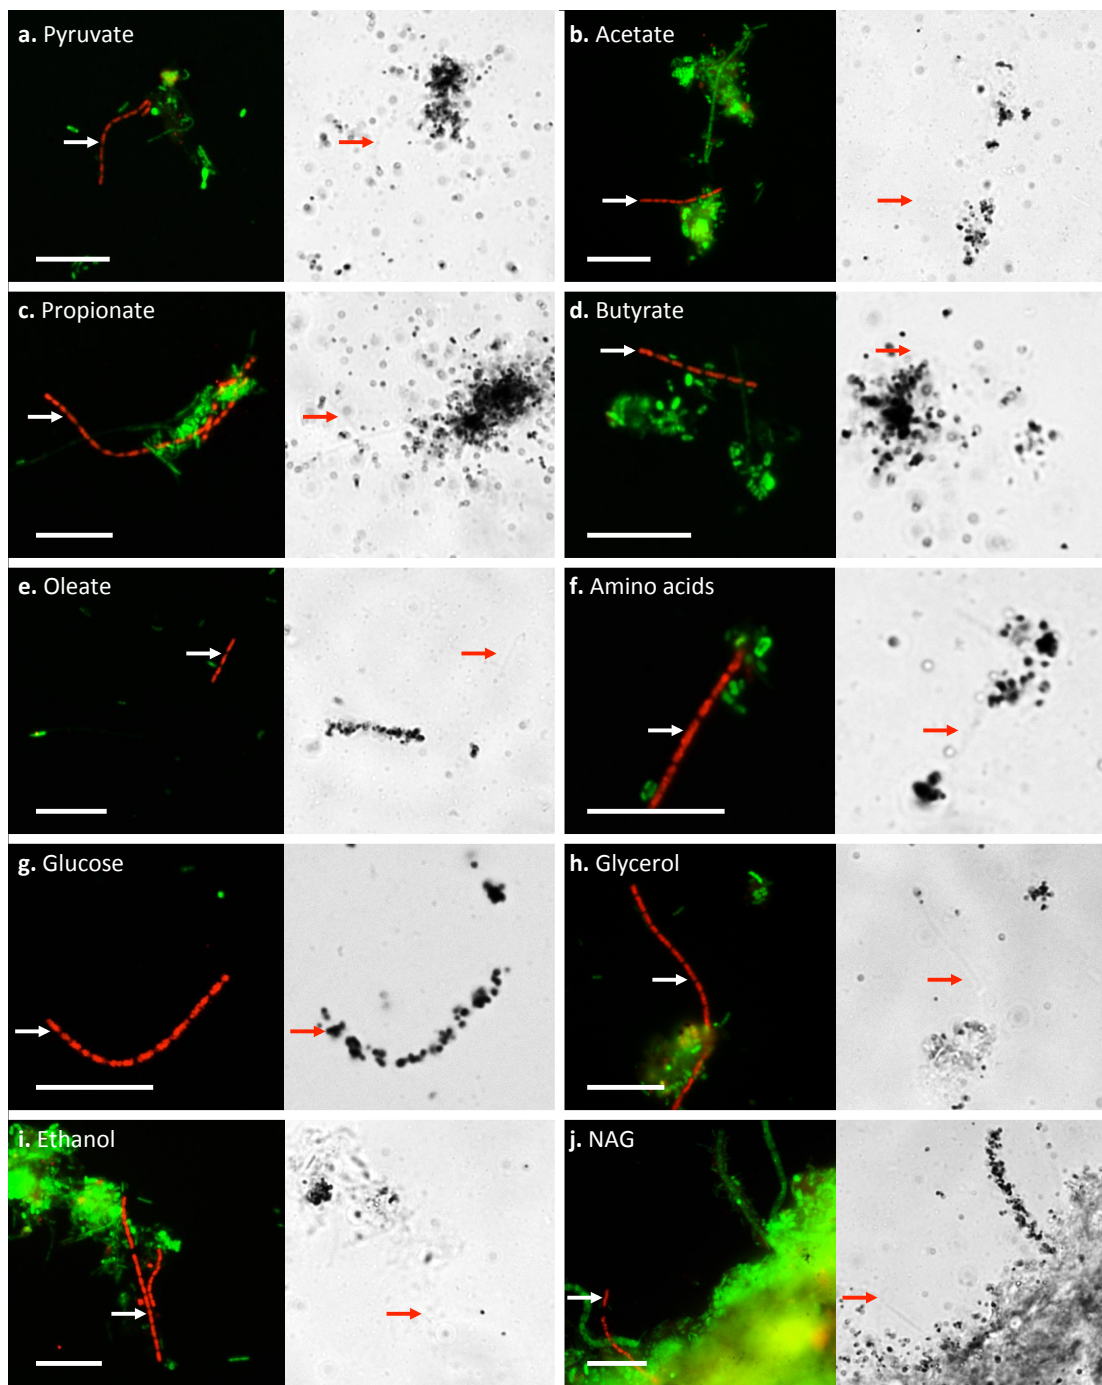

**Figure S4.** FISH and corresponding bright-field MAR micrographs for B45 taxon members in full-scale sludge. Radiolabeled MAR-substrate is indicated for each image set. Target cells in FISH micrograph overlays appear red [CFX197 (Speirs *et al.*, 2009) (Cy3 = red)] and non-target green [EUBmix (Amann *et al.*, 1990; Daims *et al.*, 1999) only]. Note that the EUBmix probe does not cover B45 members. Black silver granules indicate positive MAR signal. Arrows indicate CFX197 FISH-positive filaments. Scale bars represent 10  $\mu\text{m}$ .

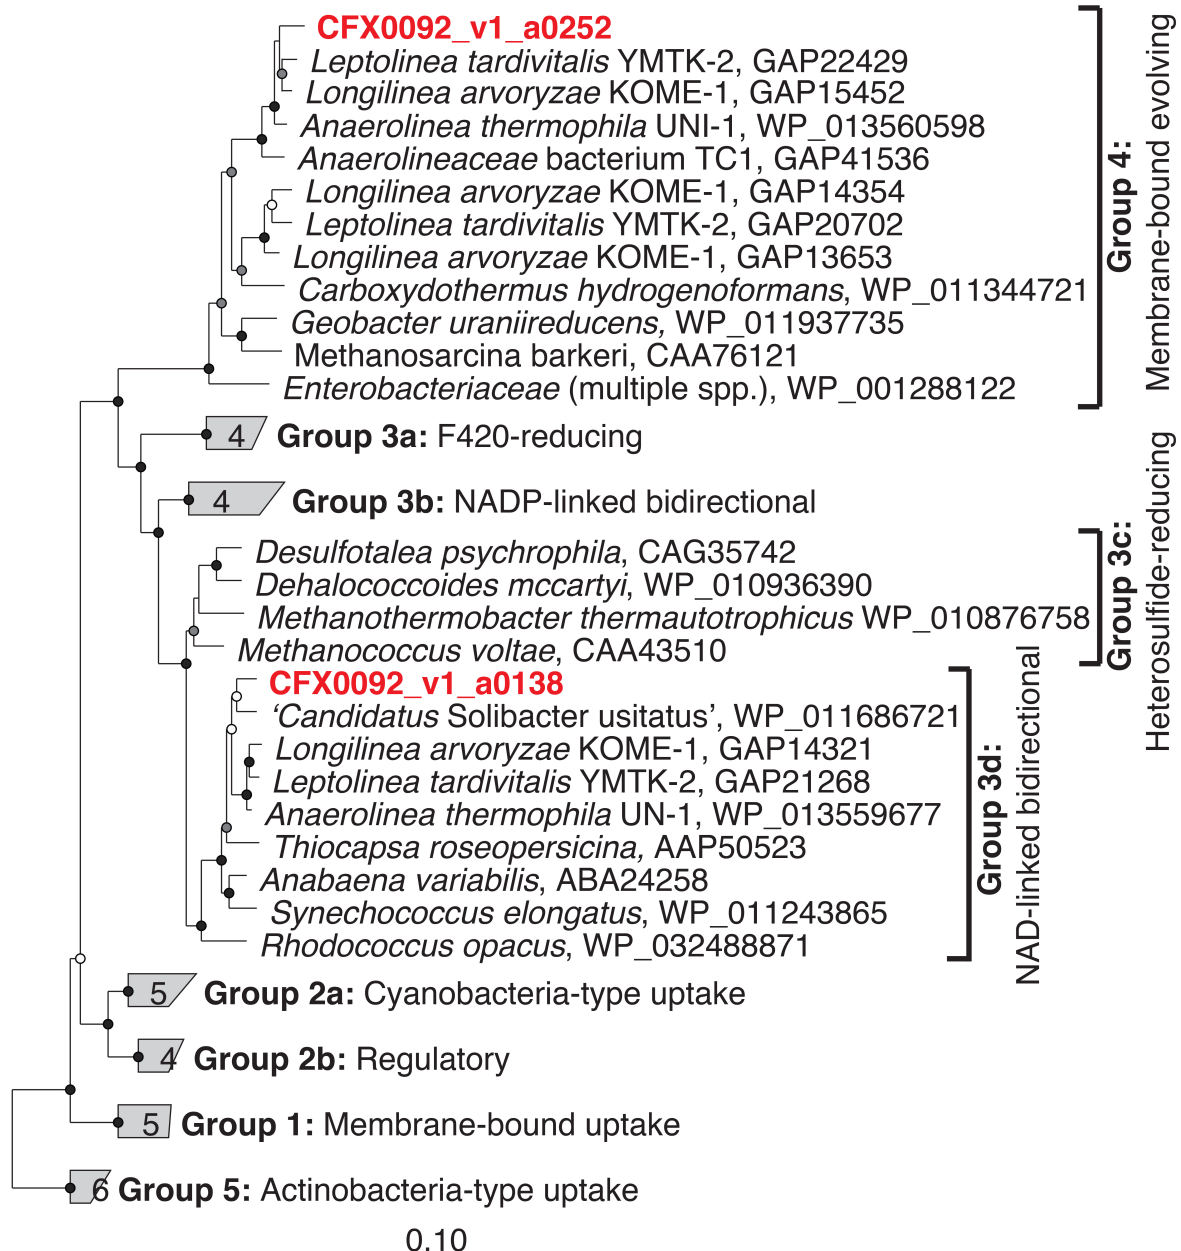

**Figure S5.** Phylogenetic affiliation of the annotated [NiFe]-hydrogenases of the Cfx-K genome (shown in red). Selected sequences were imported and aligned in the ARB software package using ClustalW and the phylogenetic tree constructed using the maximum-likelihood PHYML method with the Dayhoff amino acid substitution model. Reference sequences for the large hydrogenase sub-unit and classification is based on previous studies into hydrogenase phylogeny (Vignais and Billoud, 2007; Berney *et al.*, 2014; Koch *et al.*, 2014) with the inclusion of selected sequences related to the Cfx-K sequences (GAP22429, GAP15452, WP\_013560598, GAP41536, GAP14354, GAP20702, GAP13653, WP\_011686721, GAP14321, GAP21268 and WP\_013559677). Bootstrap values from 100 resamplings are indicated for branches with >50% (white dot), 50-70% (grey) and >90% (black) support. The scale bar represents estimated sequence divergence.

**Table S1.** Summary of activated sludge biomass samples

| <b>Location</b>            | <b>Date</b>    | <b>Analyses</b>           |
|----------------------------|----------------|---------------------------|
| Kočevje WWTP, Slovenia     | Sept. 24, 2012 | Metagenome                |
| Ejby Mølle WWTP, Denmark   | Jan. 22, 2014  | MAR-FISH                  |
| Randers WWTP, Denmark      | Jan. 7, 2014   | MAR-FISH                  |
| Aalborg West WWTP, Denmark | Mar.-Apr. 2015 | Exoenzyme activities; MAC |

All listed Danish plants are configured for biological nitrogen and phosphorus removal. The Kočevje is configured for nitrogen removal only.

**Table S2.** Genome assembly statistics

|                              | <b>Metagenome</b> | <b>Chloroflexi Bin</b> | <b>Cfx-K genome</b> |
|------------------------------|-------------------|------------------------|---------------------|
| Contigs (no.)                | 63,776            | 39                     | 3                   |
| Length (Mbp)                 | 181 395 850       | 5 091 158              | 5 033 966           |
| GC content (%)               | 55                | 64                     | 64                  |
| Read coverage* (K1.PE)       | 22                | 364                    | 362/375/359**       |
| Read coverage* (K2.PE)       | 14                | 160                    | 162/148/249**       |
| Essential genes (duplicates) | 3744              | 113 (7)                | 113 (7)             |
| rRNA operons                 | 35                | 1                      | 1                   |

\* The average read coverage of nucleotide positions in assemblies estimated by read mapping.

\*\* The average read coverage for chromosome 1/chromosome 2/plasmid.

**Table S3.** COG classification summary table for the Cfx-K genome

| <b>Property</b>                                                   | <b>Replicon 1</b> | <b>Replicon 2</b> | <b>Replicon 3</b> |
|-------------------------------------------------------------------|-------------------|-------------------|-------------------|
| D – Cell control, cell division, chromosome partitioning          | 1.3               | 1.3               | -                 |
| M – Cell wall/membrane/envelope biogenesis                        | 7.1               | 2.8               | -                 |
| N – Cell motility                                                 | 0.5               | 0.5               | 1.6               |
| O – Posttranslational modification, protein turnover, chaperones  | 3.0               | 2.1               | -                 |
| T – Signal transduction mechanisms                                | 4.8               | 7.4               | 1.6               |
| U – Intracellular trafficking, secretion, and vesicular transport | 0.9               | 2.7               | 1.6               |
| V – Defence mechanisms                                            | 1.8               | 2.5               | -                 |
| W – Extracellular structures                                      | >0.1              | 0.2               | -                 |
| Z – Cytoskeleton                                                  | >0.1              | -                 | -                 |
| A – RNA processing and modification                               | >0.1              | -                 | -                 |
| B – Chromatin structure and dynamics                              | 0.1               | -                 | -                 |
| J – Translation, ribosomal structure and biogenesis               | 4.7               | 2.3               | 1.6               |
| K – Transcription                                                 | 5.4               | 7.5               | 1.6               |
| L – Replication, recombination and repair                         | 3.9               | 5.9               | 6.6               |
| C – Energy production and conversion                              | 6.0               | 2.3               | -                 |
| E – Amino acid transport and metabolism                           | 9.5               | 6.2               | 1.6               |
| F – Nucleotide transport and metabolism                           | 1.6               | 1.3               | -                 |
| G – Carbohydrate transport and metabolism                         | 7.1               | 6.4               | 1.6               |
| H – Coenzyme transport and metabolism                             | 2.5               | 1.0               | -                 |
| I – Lipid transport and metabolism                                | 3.1               | 1.7               | -                 |
| P – Inorganic ion transport and metabolism                        | 5.2               | 5.4               | 1.6               |
| Q – Secondary metabolites biosynthesis, transport and catabolism  | 3.0               | 1.8               | -                 |
| R – General function prediction only                              | 15.4              | 16.6              | 1.6               |
| S – Function unknown                                              | 7.6               | 8.1               | 3.3               |
| Unclassified                                                      | 25.9              | 35.9              | 82.0              |



**Table S4.** Summary of phenotypic characteristics of members of the classes Ardenticatenia, Anaerolineae and Caldilineae

| Species                                               | Isolation source                | Temperature optimum | Physiology                              | Electron acceptor conditions                                                                                                 | Carbon sources/electron donors**                  | Fermentation by-products (from sugars)                                                                | References                                |
|-------------------------------------------------------|---------------------------------|---------------------|-----------------------------------------|------------------------------------------------------------------------------------------------------------------------------|---------------------------------------------------|-------------------------------------------------------------------------------------------------------|-------------------------------------------|
| <b>Class Ardenticatenia***</b>                        |                                 |                     |                                         |                                                                                                                              |                                                   |                                                                                                       |                                           |
| <i>Ardenticatena maritima</i> <sup>T</sup>            | Coastal hydrothermal field      | Thermophile         | Chemoheterotroph                        | <i>Facultative anaerobe:</i> O <sub>2</sub> ; NO <sub>3</sub> <sup>-</sup> (to NH <sub>3</sub> or N <sub>2</sub> *); Fe(III) | Carbohydrates; proteins; fatty acids <sup>w</sup> | -                                                                                                     | (Kawaichi <i>et al.</i> , 2013, 2015)     |
| Cfx-K (B45)                                           | Activated sludge                | Mesophile           | Chemoheterotroph; Autotroph?; Fermenter | <i>Facultative anaerobe:</i> O <sub>2</sub> ; NO <sub>2</sub> <sup>-</sup> (to NH <sub>3</sub> *); N <sub>2</sub> O*         | Carbohydrates                                     | Acetate*; lactate*; ethanol*; acetoin*; H <sub>2</sub> *                                              | This study                                |
| <b>Class Anaerolineae***</b>                          |                                 |                     |                                         |                                                                                                                              |                                                   |                                                                                                       |                                           |
| <i>Bellilinea caldifistulae</i> <sup>T</sup>          | Thermophilic anaerobic digester | Thermophile         | Chemoheterotroph; Fermenter             | <i>Obligate anaerobe</i>                                                                                                     | Carbohydrates; proteins <sup>w</sup>              | Acetate; lactate; formate; H <sub>2</sub> ; propionate <sup>w</sup> ; pyruvate <sup>w</sup>           | (Yamada <i>et al.</i> , 2007)             |
| <i>Levilinea saccharolytica</i> <sup>T</sup>          | Mesophilic anaerobic digester   | Mesophile           | Chemoheterotroph; Fermenter             | <i>Obligate anaerobe</i>                                                                                                     | Carbohydrates; proteins                           | Acetate; formate; H <sub>2</sub> ; lactate <sup>w</sup>                                               | (Yamada <i>et al.</i> , 2006)             |
| <i>Longilinea arvoryzae</i> <sup>T</sup>              | Rice paddy soil                 | Mesophile           | Chemoheterotroph; Fermenter             | <i>Obligate anaerobe</i>                                                                                                     | Carbohydrates; proteins                           | Acetate; lactate; H <sub>2</sub>                                                                      | (Yamada <i>et al.</i> , 2007)             |
| <i>Leptolinea tardivitalis</i> <sup>T</sup>           | Mesophilic anaerobic digester   | Mesophile           | Chemoheterotroph; Fermenter             | <i>Obligate anaerobe</i>                                                                                                     | Carbohydrates; proteins                           | Acetate; lactate; pyruvate; H <sub>2</sub> ; succinate <sup>w</sup> ; formate <sup>w</sup>            | (Yamada <i>et al.</i> , 2006)             |
| <i>Pelolinea submarina</i> <sup>T</sup>               | Marine sediment                 | Mesophile           | Chemoheterotroph; Fermenter             | <i>Obligate anaerobe</i>                                                                                                     | Carbohydrates                                     | Acetate; lactate; ethanol; H <sub>2</sub> ; pyruvate <sup>w</sup> ; propionate <sup>w</sup>           | (Imachi <i>et al.</i> , 2014)             |
| <i>Ornatilinea apprima</i> <sup>T</sup>               | Hot water bath microbial mat    | Mesophile           | Chemoheterotroph; Fermenter             | <i>Obligate anaerobe</i>                                                                                                     | Carbohydrates; proteins                           | Acetate; ethanol; H <sub>2</sub> ; lactate <sup>w</sup> ; formate <sup>w</sup>                        | (Podosokorskaya <i>et al.</i> , 2013)     |
| <i>Anaerolinea thermophila</i> <sup>T</sup>           | Thermophilic anaerobic digester | Thermophile         | Chemoheterotroph; Fermenter             | <i>Obligate anaerobe</i>                                                                                                     | Carbohydrates; proteins <sup>w</sup>              | Acetate; H <sub>2</sub> ; lactate <sup>w</sup> ; succinate <sup>w</sup> ; formate <sup>w</sup>        | (Sekiguchi <i>et al.</i> , 2003)          |
| <i>Anaerolinea thermolimos</i> <sup>T</sup>           | Thermophilic anaerobic digester | Thermophile         | Chemoheterotroph; Fermenter             | <i>Obligate anaerobe</i>                                                                                                     | Carbohydrates; proteins                           | Acetate; lactate; H <sub>2</sub>                                                                      | (Yamada <i>et al.</i> , 2006)             |
| <i>Thermomarinilineae lacunofontalis</i> <sup>T</sup> | Hydrothermal vent               | Thermophile         | Chemoheterotroph; Fermenter             | <i>Obligate anaerobe</i>                                                                                                     | Proteins                                          | Not reported                                                                                          | (Nunoura <i>et al.</i> , 2013)            |
| ' <i>Thermanaerotherix daxensis</i> ' <sup>T</sup>    | Deep hot aquifer                | Thermophile         | Chemoheterotroph; Fermenter             | <i>Obligate anaerobe</i>                                                                                                     | Carbohydrates                                     | Lactate; acetate; CO <sub>2</sub> ; H <sub>2</sub> <sup>w</sup>                                       | (Grégoire, Fardeau, <i>et al.</i> , 2011) |
| <b>Class Caldilineae***</b>                           |                                 |                     |                                         |                                                                                                                              |                                                   |                                                                                                       |                                           |
| <i>Caldilinea aerophila</i> <sup>T</sup>              | Hot spring biomat               | Thermophile         | Chemoheterotroph; Fermenter             | <i>Facultative anaerobe:</i> O <sub>2</sub>                                                                                  | Carbohydrates; proteins; fatty acids              | Not reported                                                                                          | (Sekiguchi <i>et al.</i> , 2003)          |
| <i>Caldilinea tarbellica</i> <sup>T</sup>             | Deep hot aquifer                | Thermophile         | Chemoheterotroph; Fermenter             | <i>Anaerobe</i> (tolerates <1.5% O <sub>2</sub> )                                                                            | Carbohydrates; proteins                           | Succinate; lactate; acetate <sup>w</sup> ; CO <sub>2</sub> <sup>w</sup> ; H <sub>2</sub> <sup>w</sup> | (Grégoire, Bohli, <i>et al.</i> , 2011)   |
| <i>Litorilinea aerophila</i> <sup>T</sup>             | Intertidal hot spring           | Thermophile         | Chemoheterotroph                        | <i>Aerobe:</i> O <sub>2</sub>                                                                                                | Carbohydrates; proteins                           | -                                                                                                     | (Kale <i>et al.</i> , 2013)               |

All listed species have a filamentous morphology; \*Not empirically demonstrated; \*\* Proteins = protein based substrates rich in amino acids and peptides; \*\*\* Phylogeny based on SILVA version 119 (Quast *et al.*, 2013); <sup>w</sup>Relatively weak growth observed/trace amounts produced

**Table S5:** List of curated annotations for the Cfx-K genome

| No.                               | Gene          | Protein                                                               | EC No.            | Chromosome 1                          | Chromosome 2     |
|-----------------------------------|---------------|-----------------------------------------------------------------------|-------------------|---------------------------------------|------------------|
| <b>TCA cycle related</b>          |               |                                                                       |                   |                                       |                  |
| 1                                 | <i>citA/Z</i> | Citrate (Si)-synthase                                                 | 2.3.3.1           | CFX0092_v1_a0240                      | -                |
| 2                                 | <i>acnA</i>   | Aconitate hydratase                                                   | 4.2.1.3           | CFX0092_v1_a0806                      | -                |
| 3                                 | <i>acnB</i>   | Bifunctional aconitate hydratase 2 and 2-methylisocitrate dehydratase | 4.2.1.3, 4.2.1.99 | -                                     | -                |
| 4                                 | <i>icd</i>    | Isocitrate dehydrogenase (NADP(+))                                    | 1.1.1.42          | CFX0092_v1_a1590                      | -                |
| 5                                 | <i>ipd</i>    | Dihydrolipoyl dehydrogenase                                           | 1.8.1.4           | CFX0092_v1_a1697<br>CFX0092_v1_a0400  | -                |
| 6                                 | <i>sucA</i>   | Oxoglutarate dehydrogenase (succinyl-transferring)                    | 1.2.4.2           | CFX0092_v1_a3633                      | -                |
| 7                                 | <i>sucB</i>   | Dihydrolipoyllysine-residue succinyltransferase                       | 2.3.1.61          | CFX0092_v1_a3632                      | -                |
| 8                                 | <i>sucC</i>   | Succinate--CoA ligase (ADP-forming), beta subunit                     | 6.2.1.5           | CFX0092_v1_a0656                      | -                |
| 9                                 | <i>sucD</i>   | Succinate--CoA ligase (ADP-forming), alpha subunit                    | 6.2.1.5           | CFX0092_v1_a0655                      | -                |
| 10                                | <i>korA</i>   | 2-oxoglutarate synthase, alpha sub-unit                               | 1.2.7.3           | CFX0092_v1_a1541<br>CFX0092_v1_a1544* | -                |
| 11                                | <i>korB</i>   | 2-oxoglutarate synthase, beta sub-unit                                | 1.2.7.3           | CFX0092_v1_a1542<br>CFX0092_v1_a1545* | -                |
| 12                                | <i>sdhA</i>   | Succinate dehydrogenase/fumarate reductase, flavoprotein subunit      | 1.3.5.1           | CFX0092_v1_a0554                      | -                |
| 13                                | <i>sdhB</i>   | Succinate dehydrogenase/fumarate reductase, iron sulphur subunit      | 1.3.5.1           | CFX0092_v1_a0555                      | -                |
| 14                                | <i>sdhC</i>   | Succinate dehydrogenase/fumarate reductase, cytochrome B subunit      | 1.3.5.1           | CFX0092_v1_a0552                      | -                |
| 15                                | <i>sdhD</i>   | Succinate dehydrogenase, hydrophobic membrane anchor subunit          | 1.3.5.1           | CFX0092_v1_a0553                      | -                |
| 16                                | <i>fumC</i>   | Fumarate hydratase                                                    | 4.2.1.2           | CFX0092_v1_a1397                      | -                |
| 17                                | <i>mdh</i>    | Malate dehydrogenase                                                  | 1.1.1.37          | CFX0092_v1_a1699                      | -                |
| <b>Glyoxylate shunt</b>           |               |                                                                       |                   |                                       |                  |
| 18                                | <i>aceA</i>   | Isocitrate lyase                                                      | 4.1.3.1           | CFX0092_v1_a2006                      | -                |
| 19                                | <i>aceB</i>   | Malate synthase                                                       | 2.3.3.9           | CFX0092_v1_a2005                      | -                |
| <b>Glycolysis/gluconeogenesis</b> |               |                                                                       |                   |                                       |                  |
| 20                                | <i>ppc</i>    | Phosphoenolpyruvate carboxykinase                                     | 4.1.1.31          | CFX0092_v1_a1393                      | -                |
| 21                                | <i>pckA</i>   | Phosphoenolpyruvate carboxykinase (ATP)                               | 4.1.1.49          | CFX0092_v1_a0089                      | -                |
| 22                                | <i>maeB</i>   | Malate dehydrogenase                                                  | 1.1.1.40          | -                                     | CFX0092_v1_b0357 |

|                                 |             |                                                                                                                                    |                    |                                                          |                   |
|---------------------------------|-------------|------------------------------------------------------------------------------------------------------------------------------------|--------------------|----------------------------------------------------------|-------------------|
| 23                              | <i>pdhA</i> | Pyruvate dehydrogenase, decarboxylase (E1) alpha sub-unit                                                                          | 1.2.4.1            | CFX0092_v1_a0233                                         | -                 |
| 24                              | <i>pdhB</i> | Pyruvate dehydrogenase, decarboxylase (E1) alpha sub-unit                                                                          | 1.2.4.1            | CFX0092_v1_a0232                                         | -                 |
| 25                              | <i>pdhC</i> | Dihydrolipoamide acetyltransferase (E2)                                                                                            | 2.3.1.12           | CFX0092_v1_a0231                                         | -                 |
| 26                              | <i>pdhD</i> | Dihydrolipoyl dehydrogenase                                                                                                        | 1.8.1.4            | CFX0092_v1_a0400<br>CFX0092_v1_a1697                     | -                 |
| 27                              | <i>porA</i> | Pyruvate:ferredoxin oxidoreductase, alpha subunit                                                                                  | 1.2.7.1            | CFX0092_v1_a1544*                                        | -                 |
| 28                              | <i>porB</i> | Pyruvate:ferredoxin oxidoreductase, beta subunit                                                                                   | 1.2.7.1            | CFX0092_v1_a1545*                                        | -                 |
| 29                              | <i>nifJ</i> | Pyruvate-flavodoxin oxidoreductase                                                                                                 | 1.2.7.-            | CFX0092_v1_a0442                                         | -                 |
| 30                              | <i>glcP</i> | Glucose/mannose: H <sup>+</sup> symporter                                                                                          | -                  | CFX0092_v1_a1631*                                        | -                 |
| 31                              | <i>glk</i>  | Glucokinase                                                                                                                        | 2.7.1.2            | CFX0092_v1_a1479                                         | -                 |
| 32                              | <i>ppgK</i> | Polyphosphate glucokinase                                                                                                          | 2.7.1.63           | CFX0092_v1_a2623                                         | -                 |
| 33                              | <i>pgi</i>  | Bifunctional glucose-6-phosphate isomerase/transaldolase                                                                           | 5.3.1.9, 2.2.1.2   | CFX0092_v1_a3597                                         | -                 |
| 34                              | <i>pfkA</i> | 6-phosphofructokinase                                                                                                              | 2.7.1.11           | CFX0092_v1_a0941<br>CFX0092_v1_a0942<br>CFX0092_v1_a1389 | -                 |
| 35                              | <i>glpX</i> | Fructose-bisphosphatase                                                                                                            | 3.1.3.11           | CFX0092_v1_a0722                                         | CFX0092_v1_b0338  |
| 36                              | <i>fba</i>  | Fructose-bisphosphate aldolase                                                                                                     | 4.1.2.13           | -                                                        | CFX0092_v1_b0547  |
| 37                              | <i>tpiA</i> | Triose-phosphate isomerase                                                                                                         | 5.3.1.1            | CFX0092_v1_a1277                                         | -                 |
| 38                              | <i>gapA</i> | Glyceraldehyde-3-phosphate dehydrogenase                                                                                           | 1.2.1.12           | CFX0092_v1_a0726                                         | -                 |
| 39                              | <i>pgk</i>  | Phosphoglycerate kinase                                                                                                            | 2.7.2.3            | CFX0092_v1_a1960                                         | -                 |
| 40                              | <i>gpm</i>  | Phosphoglycerate mutase                                                                                                            | 5.4.2.12           | CFX0092_v1_a0373<br>CFX0092_v1_a0535                     | CFX0092_v1_b0369* |
| 41                              | <i>eno</i>  | Phosphopyruvate hydratase                                                                                                          | 4.2.1.11           | CFX0092_v1_a3618                                         | -                 |
| 42                              | <i>pyk</i>  | Pyruvate kinase                                                                                                                    | 2.7.1.40           | CFX0092_v1_a1836                                         | -                 |
| 43                              | <i>pps</i>  | Pyruvate, water dikinase                                                                                                           | 2.7.9.1            | CFX0092_v1_a0441                                         | -                 |
| <b>Entner-Doudoroff pathway</b> |             |                                                                                                                                    |                    |                                                          |                   |
| 44                              | <i>edd</i>  | Phosphogluconate dehydratase                                                                                                       | 4.2.1.12           | -                                                        | -                 |
| 45                              | <i>eda</i>  | Multifunctional 2-keto-3-deoxygluconate 6-phosphate aldolase and 2-keto-4-hydroxyglutarate aldolase and oxaloacetate decarboxylase | 4.1.2.14, 4.1.3.16 | -                                                        | -                 |
| <b>Fermentation</b>             |             |                                                                                                                                    |                    |                                                          |                   |
| 46                              | <i>ldh</i>  | Lactate dehydrogenase                                                                                                              | 1.1.1.27           | CFX0092_v1_a0479                                         | -                 |
| 47                              | <i>eutE</i> | Aldehyde dehydrogenase                                                                                                             | 1.2.1.10           | CFX0092_v1_a2131                                         | -                 |
| 48                              | <i>adh</i>  | Alcohol dehydrogenase                                                                                                              | 1.1.1.1            | CFX0092_v1_a0379*                                        | -                 |

|                                  |                             |                                                   |                  |                                                            |                   |                                      |
|----------------------------------|-----------------------------|---------------------------------------------------|------------------|------------------------------------------------------------|-------------------|--------------------------------------|
|                                  |                             |                                                   |                  |                                                            | CFX0092_v1_a2782* |                                      |
| 49                               | <i>ilvH</i>                 | Acetolactate synthase, small sub-unit             | 2.2.1.6          | CFX0092_v1_a0225                                           | -                 |                                      |
| 50                               | <i>ilvI</i>                 | Acetolactate synthase, large sub-unit             | 2.2.1.6          | CFX0092_v1_a0226                                           | -                 |                                      |
| 51                               | <i>ald</i>                  | Acetolactate decarboxylase                        | 4.1.1.5          | CFX0092_v1_a2994                                           | -                 |                                      |
| 52                               | <i>yfiQ</i>                 | Acetyl-transferase                                | 6.2.1.13         | -                                                          |                   | CFX0092_v1_b0110<br>CFX0092_v1_b0132 |
| 53                               | -                           | Aldehyde dehydrogenase                            | 1.2.1.3          | CFX0092_v1_a0733*<br>CFX0092_v1_a1380*                     |                   | CFX0092_v1_b0470*                    |
| 54                               | <i>aor</i>                  | Aldehyde ferredoxin oxidoreductase                | 1.2.7.5          | CFX0092_v1_a2072                                           | -                 |                                      |
| 55                               | <i>acsA</i>                 | Acetyl-coenzyme A synthetase                      | 6.2.1.1          | CFX0092_v1_a0396                                           | -                 |                                      |
| <b>Pentose phosphate pathway</b> |                             |                                                   |                  |                                                            |                   |                                      |
| 56                               | <i>zwf</i>                  | Glucose-6-phosphate dehydrogenase                 | 1.1.1.49         | CFX0092_v1_a0169                                           | -                 |                                      |
| 57                               | <i>pgl</i>                  | 6-phosphogluconolactonase                         | 3.1.1.31         | CFX0092_v1_a1478                                           | -                 |                                      |
| 58                               | <i>gnd</i>                  | Phosphogluconate dehydrogenase                    | 1.1.1.44         | CFX0092_v1_a0212                                           | -                 |                                      |
| 59                               | <i>rpe</i>                  | Ribulose-phosphate isomerase                      | 5.1.3.1          | -                                                          |                   | CFX0092_v1_b0337                     |
| 60                               | <i>rpiA</i>                 | Ribose-5-phosphate isomerase                      | 5.3.1.6          | CFX0092_v1_a2219                                           | -                 |                                      |
| 61                               | <i>rpiB</i>                 | Ribose-5-phosphate isomerase                      | 5.3.1.6, 5.3.1.- | CFX0092_v1_a2137*                                          |                   | CFX0092_v1_b0773*                    |
| 62                               | <i>tkt</i>                  | Transketolase                                     | 2.2.1.1          | CFX0092_v1_a0909                                           | -                 |                                      |
| 63                               | <i>tal</i>                  | Transaldolase                                     | 2.2.1.2          | CFX0092_v1_a0910<br>CFX0092_v1_a3597                       | -                 |                                      |
| <b>Calvin cycle</b>              |                             |                                                   |                  |                                                            |                   |                                      |
| 64                               | <i>cbbL</i>                 | Ribulose biophosphate carboxylase, large sub-unit | 4.1.1.39         | -                                                          |                   | CFX0092_v1_b0544                     |
| 65                               | <i>prk</i>                  | Phosphoribulokinase                               | 2.7.1.19         | -                                                          |                   | CFX0092_v1_b0545                     |
| <b>Glycogen metabolism</b>       |                             |                                                   |                  |                                                            |                   |                                      |
| 66                               | <i>pgm</i>                  | Phosphoglucomutase                                | 5.4.2.2          | CFX0092_v1_a2722<br>CFX0092_v1_a0533*<br>CFX0092_v1_a0683* |                   | -                                    |
| 67                               | <i>glgC</i>                 | Glucose-1-phosphate adenylyltransferase           | 2.7.7.27         | CFX0092_v1_a3183                                           | -                 |                                      |
| 68                               | <i>glgA</i>                 | Starch (bacterial glycogen) synthase              | 2.4.1.21         | CFX0092_v1_a3245                                           | -                 |                                      |
| 69                               | <i>glgB</i>                 | 1,4-alpha-glucan-branching enzyme                 | 2.4.1.18         | CFX0092_v1_a0318<br>CFX0092_v1_a1326*                      |                   | -                                    |
| 70                               | <i>glgP,</i><br><i>glgY</i> | Glycogen phosphorylase                            | 2.4.1.1          | CFX0092_v1_a1797<br>CFX0092_v1_a3214                       |                   | -                                    |

|                    |               |                                                     |          |                                                            |                  |
|--------------------|---------------|-----------------------------------------------------|----------|------------------------------------------------------------|------------------|
| 71                 | <i>glgX</i>   | Glycogen debranching enzyme                         | 3.2.1.-  | CFX0092_v1_a2220*                                          | CFX0092_v1_b0489 |
| 72                 | <i>malZ</i>   | Alpha-glucosidase                                   | 3.2.1.20 | CFX0092_v1_a2594<br>CFX0092_v1_a0054*<br>CFX0092_v1_a3350* | -                |
| 73                 | <i>malQ</i>   | 4-alpha-glucanotransferase                          | 2.4.1.25 | CFX0092_v1_a3243                                           | -                |
| <b>Hydrogenase</b> |               |                                                     |          |                                                            |                  |
| 74                 | <i>echA</i>   | Hydrogenase, membrane subunit (echA-like)           | -        | CFX0092_v1_a0257*                                          | -                |
| 75                 | <i>echB</i>   | Hydrogenase, membrane subunit (echB-like)           | -        | CFX0092_v1_a0251*                                          | -                |
| 76                 | <i>echC</i>   | Ni,Fe-hydrogenase III small subunit (echC-like)     | -        | CFX0092_v1_a0254*                                          | -                |
| 77                 | <i>echE</i>   | Ni,Fe-hydrogenase III, large subunit (echE-like)    | 1.12.7.2 | CFX0092_v1_a0252*                                          | -                |
| 78                 | <i>echF</i>   | 4Fe-4S ferredoxin, iron-sulphur binding (echF-like) | -        | CFX0092_v1_a0250*                                          | -                |
| 79                 | <i>hyfB</i>   | Hydrogenase, membrane subunit (hyfB-like)           | -        | CFX0092_v1_a0256*                                          | -                |
| 80                 | <i>hoxF</i>   | NAD reducing hydrogenase sub-unit                   | 1.12.1.2 | CFX0092_v1_a0135                                           | -                |
| 81                 | <i>hoxU</i>   | NAD reducing hydrogenase sub-unit                   | 1.12.1.2 | CFX0092_v1_a0136                                           | -                |
| 82                 | <i>hoxY</i>   | NAD reducing hydrogenase sub-unit                   | 1.12.1.2 | CFX0092_v1_a0137                                           | -                |
| 83                 | <i>hoxH</i>   | NAD reducing hydrogenase sub-unit                   | 1.12.1.2 | CFX0092_v1_a0138                                           | -                |
| 84                 | <i>hoxE</i>   | NAD reducing hydrogenase sub-unit                   | 1.12.1.2 | CFX0092_v1_a0134                                           | -                |
| 85                 | <i>focA</i>   | Formate transporter                                 | -        | CFX0092_v1_a0448                                           | -                |
| 86                 | <i>fdhD</i>   | Formate dehydrogenase formation protein FdhD        | -        | CFX0092_v1_a2095                                           | -                |
| 87                 | <i>fdnH</i>   | Formate dehydrogenase, beta subunit                 | 1.2.1.2  | CFX0092_v1_a2096*                                          | -                |
| 88                 | <i>fdhA/F</i> | Formate dehydrogenase, alpha subunit                | 1.2.1.2  | CFX0092_v1_a0447<br>CFX0092_v1_a2092                       | -                |
| <b>Respiration</b> |               |                                                     |          |                                                            |                  |
| 89                 | <i>ctaD</i>   | Cytochrome c oxidase subunit 1                      | 1.9.3.1  | CFX0092_v1_a3385                                           | -                |
| 90                 | <i>ctaC</i>   | Cytochrome c oxidase subunit 2                      | 1.9.3.1  | CFX0092_v1_a3384                                           | -                |
| 91                 | <i>ctaE</i>   | Cytochrome c oxidase subunit 3                      | 1.9.3.1  | CFX0092_v1_a3387                                           | -                |
| 92                 | <i>ctaG</i>   | Cytochrome c assembly factor                        | -        | CFX0092_v1_a3388                                           | -                |
| 93                 | <i>nuoA</i>   | NADH-quinone oxidoreductase subunit A               | 1.6.5.3  | CFX0092_v1_a1770<br>CFX0092_v1_a2674                       | -                |
| 94                 | <i>nuoB</i>   | NADH-quinone oxidoreductase subunit B               | 1.6.5.3  | CFX0092_v1_a1771                                           | -                |
| 95                 | <i>nuoC</i>   | NADH-quinone oxidoreductase subunit C               | 1.6.5.3  | CFX0092_v1_a1773                                           | -                |
| 96                 | <i>nuoD</i>   | NADH-quinone oxidoreductase subunit D               | 1.6.5.3  | CFX0092_v1_a1774                                           | -                |

|                            |              |                                                          |          |                                                          |   |
|----------------------------|--------------|----------------------------------------------------------|----------|----------------------------------------------------------|---|
| 97                         | <i>nuoE</i>  | NADH-quinone oxidoreductase subunit E                    | 1.6.5.3  | CFX0092_v1_a1775                                         | - |
| 98                         | <i>nuoF</i>  | NADH-quinone oxidoreductase subunit F                    | 1.6.5.3  | CFX0092_v1_a1776                                         | - |
| 99                         | <i>nuoG</i>  | NADH-quinone oxidoreductase subunit G                    | 1.6.5.3  | CFX0092_v1_a1778                                         | - |
| 100                        | <i>nuoH</i>  | NADH-quinone oxidoreductase subunit H                    | 1.6.5.3  | CFX0092_v1_a1779<br>CFX0092_v1_a2675                     | - |
| 101                        | <i>nuoI</i>  | NADH-quinone oxidoreductase subunit I                    | 1.6.5.3  | CFX0092_v1_a1780                                         | - |
| 102                        | <i>nuoJ</i>  | NADH-quinone oxidoreductase subunit J                    | 1.6.5.3  | CFX0092_v1_a1781<br>CFX0092_v1_a2676                     | - |
| 103                        | <i>nuoK</i>  | NADH-quinone oxidoreductase subunit K                    | 1.6.5.3  | CFX0092_v1_a1782<br>CFX0092_v1_a2677                     | - |
| 104                        | <i>nuoL</i>  | NADH-quinone oxidoreductase subunit L                    | 1.6.5.3  | CFX0092_v1_a1783<br>CFX0092_v1_a2678                     | - |
| 105                        | <i>nuoM</i>  | NADH-quinone oxidoreductase subunit M                    | 1.6.5.3  | CFX0092_v1_a1784<br>CFX0092_v1_a2679<br>CFX0092_v1_a2680 | - |
| 106                        | <i>nuoN</i>  | NADH-quinone oxidoreductase subunit N                    | 1.6.5.3  | CFX0092_v1_a1795<br>CFX0092_v1_a2681                     | - |
| 107                        | <i>atpB</i>  | ATP synthase F0, subunit A                               | 3.6.3.14 | CFX0092_v1_a2683                                         | - |
| 108                        | <i>atpF</i>  | ATP synthase F0, subunit B                               | 3.6.3.14 | CFX0092_v1_a2685                                         | - |
| 109                        | <i>atpE</i>  | ATP synthase F0, subunit C                               | 3.6.3.14 | CFX0092_v1_a2684                                         | - |
| 110                        | <i>atpA</i>  | ATP synthase F1, alpha subunit                           | 3.6.3.14 | CFX0092_v1_a1718                                         | - |
| 111                        | <i>atpD</i>  | ATP synthase F1, beta subunit                            | 3.6.3.14 | CFX0092_v1_a1716                                         | - |
| 112                        | <i>atpG</i>  | ATP synthase F1, gamma subunit                           | 3.6.3.14 | CFX0092_v1_a1717                                         | - |
| 113                        | <i>atpH</i>  | ATP synthase F1, delta subunit                           | 3.6.3.14 | -                                                        | - |
| 114                        | <i>atpC</i>  | ATP synthase F1, epsilon subunit                         | 3.6.3.14 | CFX0092_v1_a1715                                         | - |
| <b>Nitrogen metabolism</b> |              |                                                          |          |                                                          |   |
| 115                        | <i>nirfA</i> | Nitrite reductase (cytochrome; ammonia-forming)          | 1.7.2.2  | CFX0092_v1_a1256                                         | - |
| 116                        | <i>nirfH</i> | Cytochrome c-type protein NrfH                           | -        | CFX0092_v1_a1255                                         | - |
| 117                        | <i>nosZ</i>  | Nitrous oxide reductase                                  | 1.7.2.4  | CFX0092_v1_a0104                                         | - |
| 118                        | <i>nosD</i>  | Nitrous oxide reductase family maturation protein        | -        | CFX0092_v1_a0102                                         | - |
| 119                        | <i>nosF</i>  | ABC transporter ATP-binding protein nosF                 | -        | CFX0092_v1_a0101                                         | - |
| 120                        | <i>nosY</i>  | Nitrous oxide reductase maturation transmembrane protein | -        | CFX0092_v1_a0100                                         | - |
| 121                        | <i>nosL</i>  | Nitrous oxide reductase accessory protein                | -        | CFX0092_v1_a0099<br>CFX0092_v1_a0098                     | - |

|                              |             |                                  |          |                                                          |   |
|------------------------------|-------------|----------------------------------|----------|----------------------------------------------------------|---|
| <b>122</b>                   | <i>amtB</i> | Ammonium transporter             | -        | CFX0092_v1_a1028                                         | - |
| <b><i>Storage lipids</i></b> |             |                                  |          |                                                          |   |
| <b>123</b>                   | <i>aftA</i> | Diacylglycerol O-acyltransferase | 2.3.1.20 | CFX0092_v1_a0084<br>CFX0092_v1_a0211<br>CFX0092_v1_a2593 | - |
| <b>124</b>                   | <i>phaC</i> | PHA synthase                     | 2.3.1.-  | -                                                        | - |

\* = Substantial evidence for an alternative gene assignment or low evidence.

## References

- Amann RI, Binder BJ, Olson RJ, Chisolm SW, Devereux R, Stahl DA. (1990). Combination of 16S rRNA-targeted oligonucleotide probes with flow cytometry for analyzing mixed microbial populations. *Appl Env Microbiol* **56**:1919–1925.
- Berney M, Greening C, Hards K, Collins D, Cook GM. (2014). Three different [NiFe] hydrogenases confer metabolic flexibility in the obligate aerobe *Mycobacterium smegmatis*. *Environ Microbiol* **16**:318–330.
- Daims H, Brühl A, Amann R, Schleifer KH, Wagner M. (1999). The domain-specific probe EUB338 is insufficient for the detection of all Bacteria: development and evaluation of a more comprehensive probe set. *Syst Appl Microbiol* **22**:434–444.
- Grégoire P, Bohli M, Cayol J-L, Joseph M, Guasco S, Dubourg K, *et al.* (2011a). *Caldilinea tarbellica* sp. nov., a filamentous, thermophilic, anaerobic bacterium isolated from a deep hot aquifer in the Aquitaine Basin. *Int J Syst Evol Microbiol* **61**:1436–41.
- Grégoire P, Fardeau M-L, Joseph M, Guasco S, Hamaide F, Biasutti S, *et al.* (2011b). Isolation and characterization of *Thermanaerotherix daxensis* gen. nov., sp. nov., a thermophilic anaerobic bacterium pertaining to the phylum ‘Chloroflexi’, isolated from a deep hot aquifer in the Aquitaine Basin. *Syst Appl Microbiol* **34**:494–7.
- Imachi H, Sakai S, Lipp JS, Miyazaki M, Saito Y, Yamanaka Y, *et al.* (2014). *Pelolinea submarina* gen. nov., sp. nov., an anaerobic, filamentous bacterium of the phylum Chloroflexi isolated from subseafloor sediment. *Int J Syst Evol Microbiol* **64**:812–8.
- Kale V, Björnsdóttir SH, Friðjónsson ÓH, Pétursdóttir SK, Ómarsdóttir S, Hreggviðsson GÓ. (2013). *Litorilinea aerophila* gen. nov., sp. nov., an aerobic member of the class *Caldilineae*, phylum Chloroflexi, isolated from an intertidal hot spring. *Int J Syst Evol Microbiol* **63**:1149–54.
- Kawaichi S, Ito N, Kamikawa R, Sugawara T, Yoshida T, Sako Y. (2013). *Ardenticatena maritima* gen. nov., sp. nov., a ferric iron- and nitrate-reducing bacterium of the phylum ‘Chloroflexi’ isolated from an iron-rich coastal hydrothermal field, and description of *Ardenticatena* classis nov. *Int J Syst Evol Microbiol* **63**:2992–3002.
- Kawaichi S, Yoshida T, Sako Y, Nakamura R. (2015). Draft Genome Sequence of a Heterotrophic Facultative Anaerobic Thermophilic Bacterium, *Ardenticatena maritima* Strain 110S T. *Genome Announc* **3**:e01145–15.
- Koch H, Galushko A, Albertsen M, Schintlmeister A, Gruber-Dorninger C, Lücker S, *et al.* (2014). Growth of nitrite-oxidizing bacteria by aerobic hydrogen oxidation. *Science* **345**:1052–4.
- Markowitz VM, Chen I-MA, Palaniappan K, Chu K, Szeto E, Grechkin Y, *et al.* (2012). IMG: the intergrated microbial genomes database and comparative analysis system. *Nucleic Acids Res* **40**:D115–D122.



- Nunoura T, Hirai M, Miyazaki M, Kazama H, Makita H, Hirayama H, *et al.* (2013). Isolation and characterization of a thermophilic, obligately anaerobic and heterotrophic marine Chloroflexi bacterium from a Chloroflexi-dominated microbial community associated with a Japanese shallow hydrothermal system, and proposal for *Thermomarinilinea lacunofontalis* gen. nov., sp. nov.. *Microbes Environ* **28**:228–35.
- Parks DH, Imelfort M, Skennerton CT, Hugenholtz P, Tyson GW. (2015). CheckM: assessing the quality of microbial genomes recovered from isolates, single cells, and metagenomes. *Genome Res* doi: 10.1101/gr.186072.114.
- Podosokorskaya OA, Bonch-Osmolovskaya EA, Novikov AA, Kolganova T V, Kublanov I V. (2013). *Ornatilinea apprima* gen. nov., sp. nov., a cellulolytic representative of the class Anaerolineae. *Int J Syst Evol Microbiol* **63**:86–92.
- Speirs L, Nittami T, McIlroy S, Schroeder S, Seviour RJ. (2009). Filamentous bacterium Eikelboom type 0092 in activated sludge plants in Australia is a member of the phylum Chloroflexi. *Appl Env Microbiol* **75**:2446–2452.
- Sekiguchi Y, Yamada T, Hanada S, Ohashi A, Harada H, Kamagata Y. (2003). *Anaerolinea thermophila* gen. nov., sp. nov. and *Caldilinea aerophila* gen. nov., sp. nov., novel filamentous thermophiles that represent a previously uncultured lineage of the domain Bacteria at the subphylum level. *Int J Syst Evol Microbiol* **53**:1843–51.
- Vignais PM, Billoud B. (2007). Occurrence, classification, and biological function of hydrogenases: an overview. *Chem Rev* **107**:4206–72.
- Yamada T, Imachi H, Ohashi A, Harada H, Hanada S, Kamagata Y, *et al.* (2007). *Bellilinea caldifistulae* gen. nov., sp. nov. and *Longilinea arvoryzae* gen. nov., sp. nov., strictly anaerobic, filamentous bacteria of the phylum Chloroflexi isolated from methanogenic propionate-degrading consortia. *Int J Syst Evol Microbiol* **57**:2299–306.
- Yamada T, Sekiguchi Y, Hanada S, Imachi H, Ohashi A, Harada H, *et al.* (2006). *Anaerolinea thermolimosa* sp. nov., *Levilinea saccharolytica* gen. nov., sp. nov. and *Leptolinea tardivitalis* gen. nov., sp. nov., novel filamentous anaerobes, and description of the new classes Anaerolineae classis nov. and Caldilineae classis nov. in the bacterial phylum Chloroflexi. *Int J Syst Evol Microbiol* **56**:1331–40.
